# Supplementary material
Source: PubMed Central journal article supplement (PMC2083222)

**Figure 2: Algorithm for the Diagnosis and Management of Cows' Milk Protein Allergy (CMPA) in Formula-Fed Infants for General Paediatricians and Primary Care Physicians**

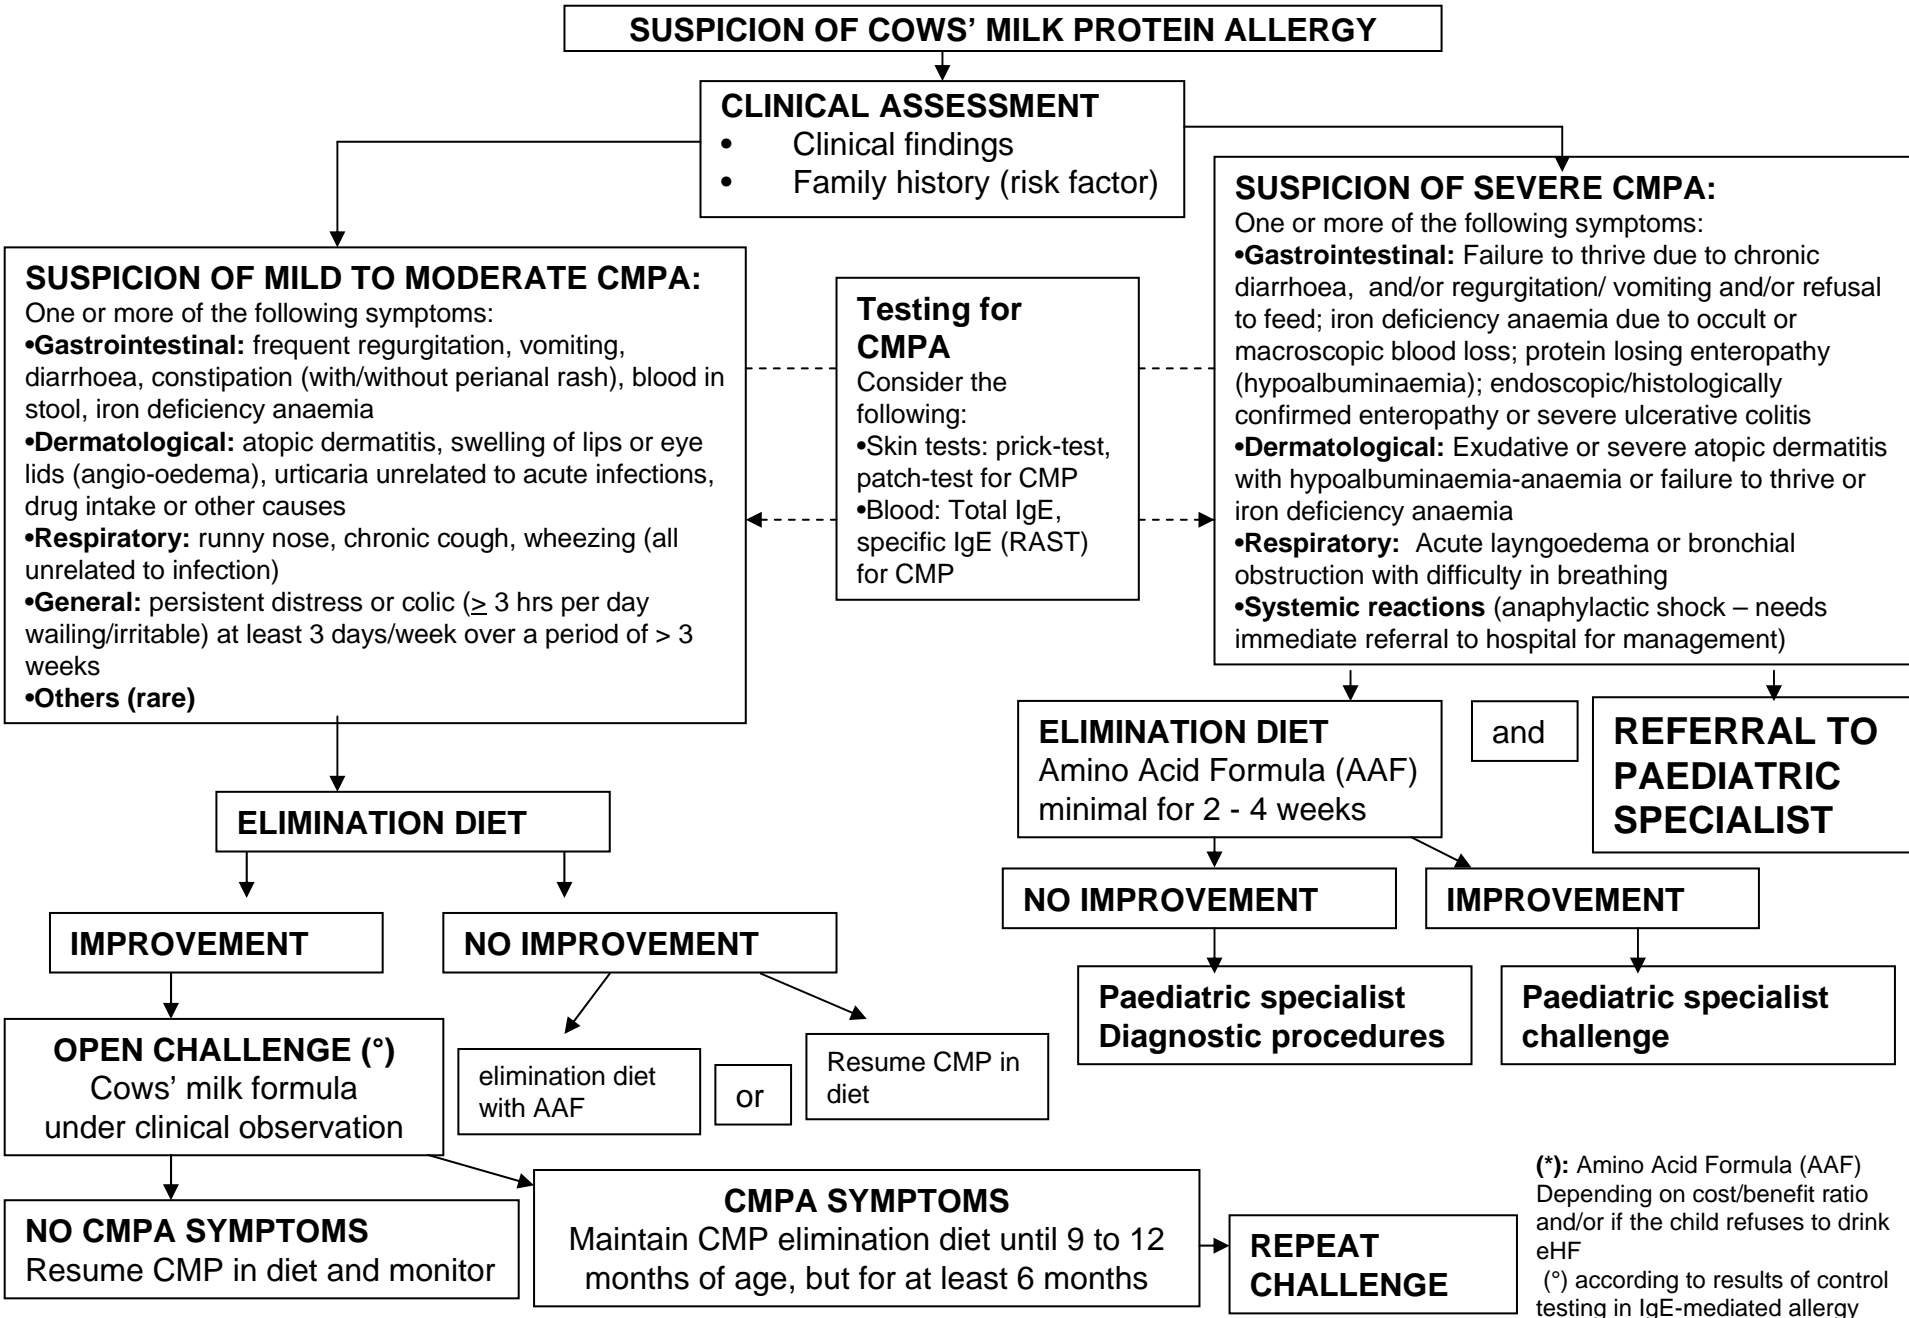

Supplement: archdisch_92_10_902__1.pdf [file archdisch_92_10_902__1.pdf]
